# Supplementary material
Source: PubMed Central journal article supplement (PMC4056882)
Supplement: ml200142x_si_001.pdf [file ml200142x_si_001.pdf]

## Supplemental Information

### A Manganese-Porphyrin Complex Decomposes $H_2O_2$ , Inhibits Apoptosis, and Acts as a Radiation Mitigator in Vivo

Detcho A. Stoyanovsky,1\* Zhentai Huang,1 Natalia A. Belikova,1 Vladimir Tyurin, Michael W. Epperly,3  
Joel S. Greenberger,3 Hülya Bayir,2 Valerian E. Kagan,1\*

*Departments of Environmental and Occupational Health,<sup>1</sup> Critical Care Medicine<sup>2</sup> and Radiation Oncology,<sup>3</sup> University  
of Pittsburgh, Pittsburgh, PA*

#### Table of Contents Graphic

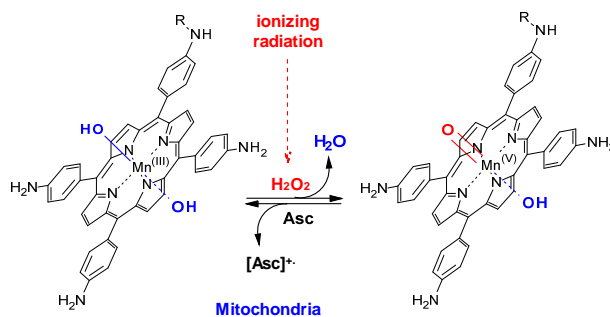

**List of abbreviations:** MEC, mouse embryonic cells; **1**, 4-[(5Z,10Z,14Z,19Z)-10,15,20-tris(4-aminophenyl)-21,23-dihydroporphyrin-5-yl]aniline; **1a**, 4-[(5Z,10Z,14Z,19Z)-10,15,20-tris(4-aminophenyl)-21,23-dihydroporphyrin-5-yl]aniline-Mn<sup>(III)</sup>; **1b**, triphenyl-[(2E)-2-[4-[(1Z,4Z,9Z,15Z)-10,15,20-tris(4-aminophenyl)-21,23-dihydroporphyrin-5-yl]phenyl]iminoethyl]phosphonium-Mn<sup>(III)</sup>; IR, ionizing radiation; IRP, radioprotectors; IRM, radiomitigators; CL, cardiolipin; Asc, ascorbic acid; GSH, glutathione; PS, phosphatidylserine; SOD, superoxide dismutase

## Synthesis

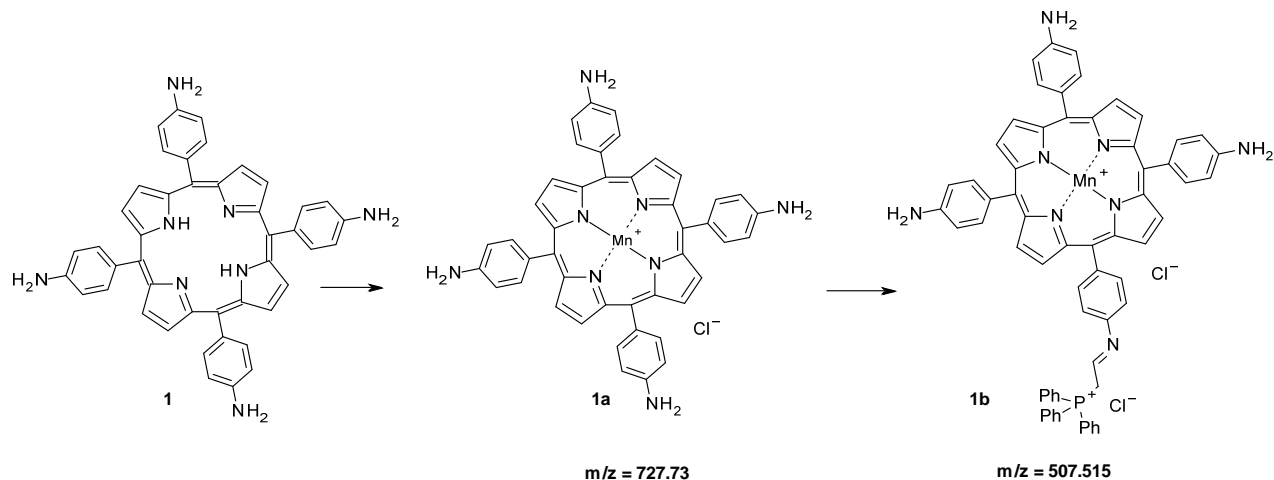

**Preparation of 1a:** (CH<sub>3</sub>CO<sub>2</sub>)<sub>2</sub>Mn (0.2 g) was refluxed for 6.5 hours in 2-propanol (200 mL) containing 5,10,15,20-tetrakis(4-aminophenyl)-21H,23H-porphine (**1**; 0.114 g). Thereafter, 50 mL of H<sub>2</sub>O were added and the alcohol was rotor-evaporated (80 mm Hg). The remaining aqueous phase was saturated with NaCl, **1a** was extracted with ethyl acetate (3 x 50 mL), the combined extracts were dried over anhydrous Na<sub>2</sub>SO<sub>4</sub>, and the organic solvent was rotor-evaporated (80 mm Hg) to afford 125 mg of pure **1a** (yield, 92%).

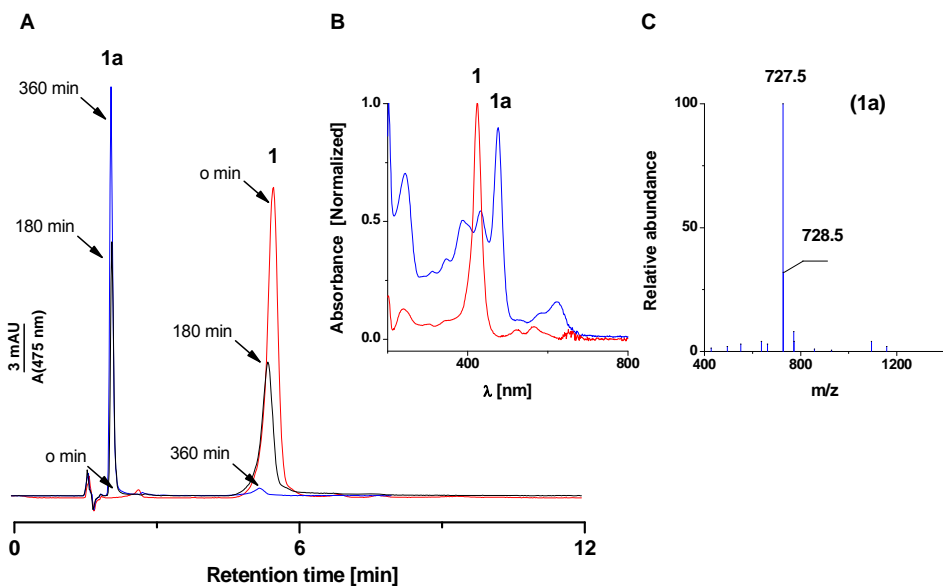

**Figure 1SI.** HPLC, UV and MS analysis of **1** (red lines, 0 min) and **1a** (blue lines, 360 min). Isocratic chromatographic separations were carried out on a C18 column (Alltima 4.6 x 250 mm, 5μ; Alltech Associates, Inc.; Deerfield, IL) with mobile phase consisting of 75 % methanol containing 0.02 M LiClO<sub>4</sub>. Flow rate, 1 mL per min.

**Preparation of 1b:** DMSO (0.3 mL) containing **1a** (11.4 mg) and 2-oxoethyl(triphenyl)phosphonium bromide ([Ph<sub>3</sub>P<sup>+</sup>CH<sub>2</sub>CHO]Br<sup>-</sup>; 5.2 mg) was heated at 70 °C for 1 hour. Then the reaction solution was subjected to a C18 semi-preparative HPLC separation (Figure 2SI; 5 mg of reaction product on the column). The fraction containing **1b** (Fig. 2SI A; 12 – 30 min; B, mass spectral analysis of the 12–30 min fraction) was collected and concentrated by rotor-evaporation. The remaining aqueous phase was saturated with NaCl and **1b**

extracted with ethyl acetate (3 x 100 mL). The unified extracts were dried over anhydrous Na<sub>2</sub>SO<sub>4</sub> and then the organic solvent was rotor-evaporated to afford 2.7 mg of **1b**.

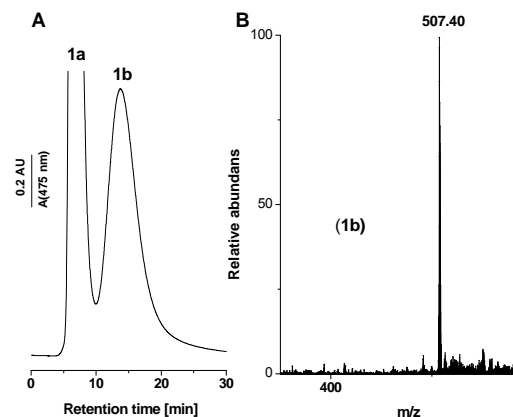

**Figure 2SI.** HPLC purification (A) and MS analysis (B) of **1b**. Column, octadecyl-functionalized silica gel (24 x 250 mm; 200-400 mesh; Sigma, MO); mobile phase, 75 % methanol containing 0.02 M LiClO<sub>4</sub>; flow rate, 10 mL per min; injected sample, DMSO (1 mL) containing 5 mg of crude reaction product.

**Hydrogen peroxide detection using mitochondria targeted HyPer:** Cells were transfected for 48 hours with pHyPer-dMito using Lipofectamine 2000 (Invitrogen, Carlsbad, CA). Transfected cells were incubated with porphyrin complexes for 1 hour and then treated with H<sub>2</sub>O<sub>2</sub>. In irradiation experiments, cells were exposed to  $\gamma$ -rays at a dose of 10 Gy and then incubated with porphyrin complexes until harvest. Cells were analyzed using flow cytometry or an Olympus Fluoview 1000 confocal microscope (Malvern, NY, USA).

**Biomarkers of Apoptosis:** Phosphatidylserine externalization was determined by annexin V-FITC apoptosis detection kit (Biovision, Mountain View, CA) according to the manufacturer's instruction. Caspase-3/7 activity was measured using a luminescence Caspase-Glo<sup>TM</sup> 3/7 assay kit (Promega, Madison, WI).

**Western blot analysis:** Samples were separated on 15% SDS-PAGE, transferred onto a nitrocellulose membrane, and probed with antibodies against cyt c (clone 7H8.2C12, BD Pharmingen) or actin (Novus; loading control), coupled with horseradish peroxidase detection.

**Isolation of mitochondria:** Mitochondrial fractions were isolated by differential centrifugation. Briefly, cells were suspended in mitochondria isolation buffer (pH 7.4; MIB) containing mannitol (210 mM), sucrose (70 mM), HEPES (10 mM), EDTA (1 mM) and a protease inhibitor cocktail. Cells were lysed by Dounce homogenization. Unbroken cells, nuclei and debris were removed by a 5 min-centrifugation at 600 $\times$ g (4 °C). Mitochondria, obtained by centrifugation at 10,000 $\times$ g (10 min), were washed once with MIB.

**Assessment of 1b in MEC and subcellular fractions:** Mouse embryonic cells (MEC; 2 $\times$ 10<sup>6</sup>) were seeded in 100 mm cell culture dishes and let to attach overnight. Thereafter, the cells were incubated with **1b** (10  $\mu$ M) in PBS at 37 °C for 30 min, washed with PBS (2 x 5 mL), and collected by trypsinization. Mitochondria were isolated as described above. In mitochondria, **1b** was analyzed by HPLC after precipitation of proteins with CH<sub>3</sub>CN (final concentration, 70 %; incubation time, 30 min (4 °C); centrifugation, 5 min at 10,000g). **1b** from cytosolic fractions was extracted by following Folch's protocol (CHCl<sub>3</sub>:CH<sub>3</sub>OH:H<sub>2</sub>O<sub>2</sub> = 2:1:1). After evaporation of CHCl<sub>3</sub>, the dry residues was re-dissolved in minimal volume of methanol and **1b** separated by isocratic HPLC as indicated in Fig. 1SI.

**Superoxide anion radical reduces cytochrome c but not 1b:** Comparative experiments for reduction of cytochrome c and **1b** by superoxide anion radical were carried out with crown ether/KO<sub>2</sub> ([crown-K<sup>+</sup>O<sub>2</sub><sup>-</sup>] + H<sub>2</sub>O  $\rightarrow$  KOH + O<sub>2</sub><sup>-</sup>; Valentine et al. 1984 *Methods Enzymol* **105**, 71; Fig. 3SI). [crown-K<sup>+</sup>O<sub>2</sub><sup>-</sup>] was prepared via stirring KO<sub>2</sub> (7.1 mg) and 18-crown-6 (80 mg) for 60 min at 25 °C in dry DMSO (1 mL) under nitrogen. The resulting solution was stored at -20 °C and used within 24 hours.

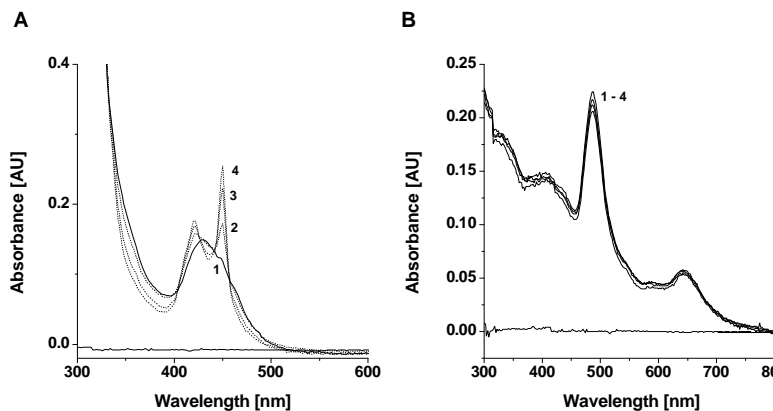

**Figure 3SI.** Absorption spectra of cytochrome c (50  $\mu\text{M}$ ; *A*) and **1b** (2  $\mu\text{M}$ ; *B*) in the absence (trace 1) and the presence of 50, 100 and 150  $\mu\text{M}$  [crown- $\text{K}^+\text{O}_2^-$ ] (traces 2-4). Reactions were carried out at 25  $^\circ\text{C}$  in 0.1 M phosphate buffer (pH 7.4). Reduction of cytochrome c was monitored by the increases in absorbance at 450 nm.

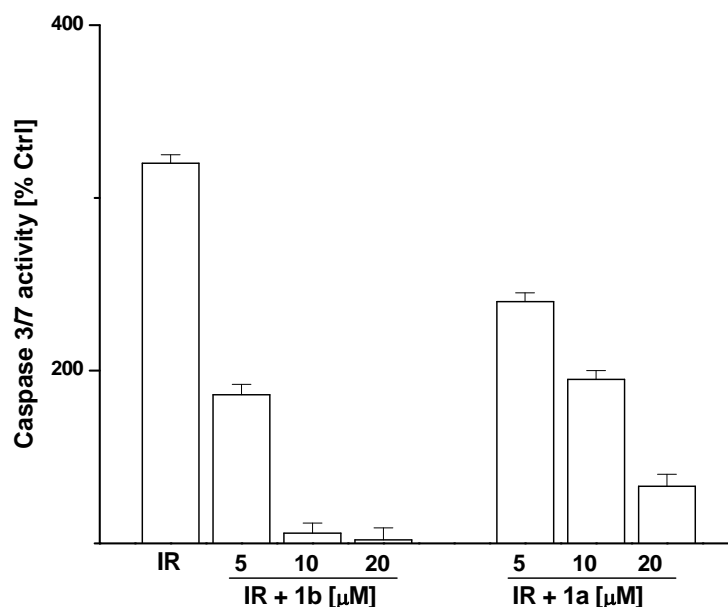

**Figure 4SI.** Comparative analysis of the effects of **1a** and **1b** on caspase 3 activity in MEC exposed to  $\gamma$ -rays. Cells ( $5 \times 10^4$ ) were seeded on 35 mm dishes and allowed to attach overnight. Cells were exposed to  $\gamma$ -rays (dose, 10 Gy) and, 15 min thereafter, treated with **1a** (or **1b**) for 30 min. Then, cells were washed, further incubated for 24 hours, and harvested for analysis of caspase 3 activity.

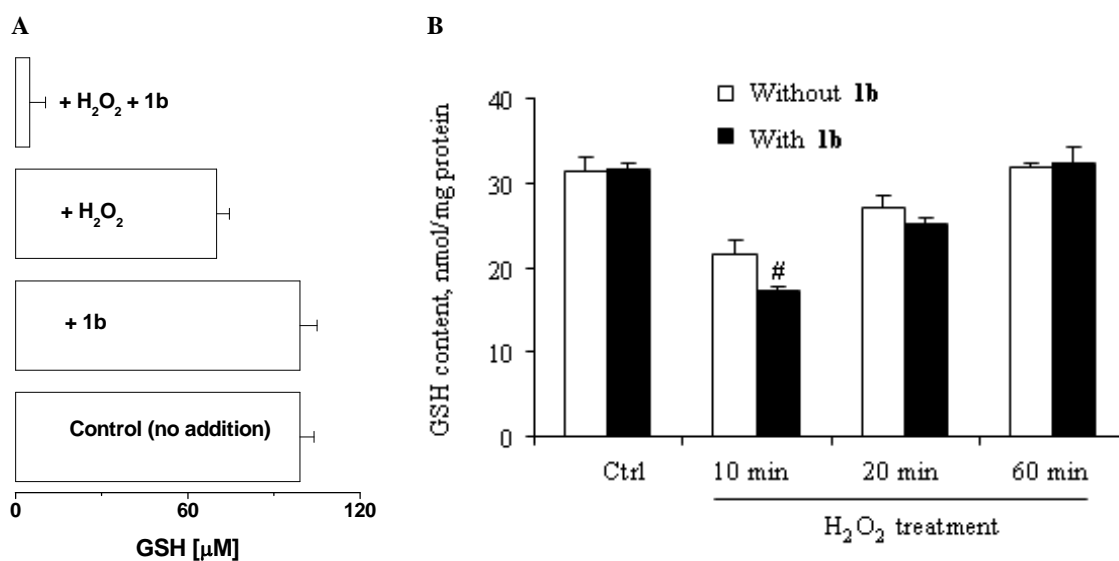

**Figure 5SI.** Effects of  $\text{H}_2\text{O}_2$  and **1b** on the oxidation of GSH in vitro. *A*- Reactions were carried out for 5 min at 25  $^\circ\text{C}$  in 0.1 M phosphate buffer (pH 7.0) and then stopped by addition of catalase (400 units/mL). GSH was assessed with Elman's reagent (5,5'-dithiobis-(2-nitrobenzoic acid) by following changes in the absorbance of the reaction solution at 412 nm. GSH, **1b** and  $\text{H}_2\text{O}_2$  were used at concentrations of 0.1 mM, 0.06 and 0.2 mM, respectively. The results represent the mean  $\pm$  S.E (n = 3). *B*- MEC were incubated for up to 60 min with 0.1 mM  $\text{H}_2\text{O}_2$  and levels of GSH were determined using a ThioGlo-1 kit (EMD, Gibbstown, NJ) following the manufacturer's protocol. The results represent the mean  $\pm$  S.E (n = 3).

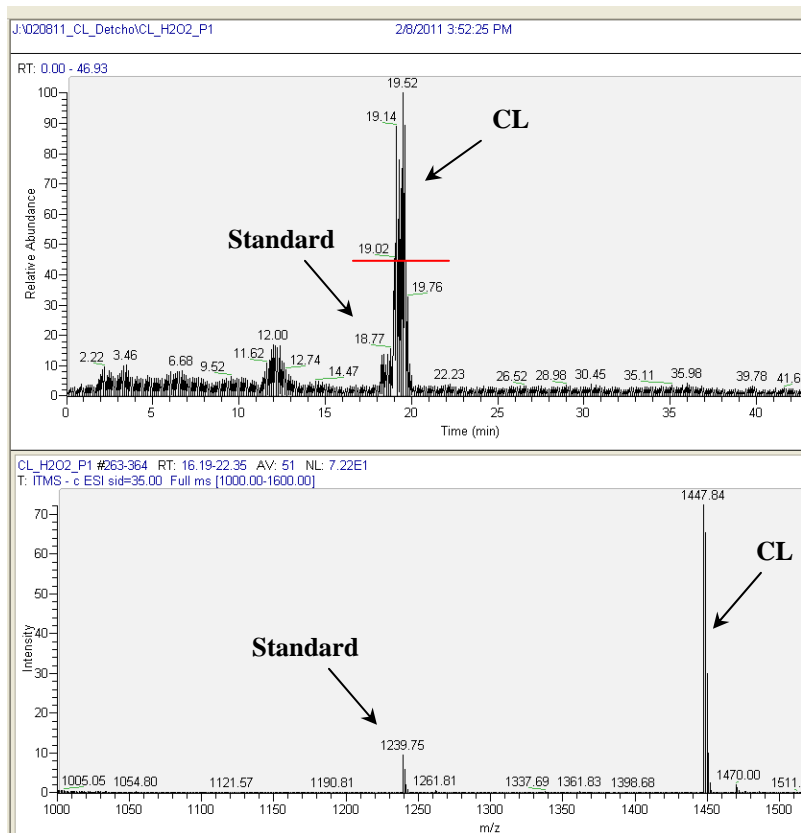

**Figure 6SI.** *Effects of 1b on the oxidation of CL by cytochrome c and H<sub>2</sub>O<sub>2</sub>.* Reactions were carried out with CL-containing phosphatidylcholine (PC) liposomes for 30 min at 25 °C in 0.1 M Hepes (pH 7.4; 0.1 mM EDTA). Liposomes were obtained by sonication of phospholipids with ultra sound (10 x 5 sec; 30 seconds relaxation; ice bath), whereby PC, CL, cytochrome c and H<sub>2</sub>O<sub>2</sub> were used at concentrations of 100, 25, 2 and 50 μM, respectively. After completion of the incubation, CL was extracted from the reaction suspension following Folch's protocol (CHCl<sub>3</sub> : MeOH : H<sub>2</sub>O = 2 : 1 : 1), the solvent was evaporated under nitrogen, the dry residue redissolved in methanol and subjected to HPLC-MS analysis. The results are representative of two independent experiments and did not differ more than 7%.
